## RESEARCH ARTICLE

# Testing different forms of regulation of yolk thyroid hormone transfer in pied flycatchers

Tom Sarraude<sup>1,2,\*</sup>, Bin-Yan Hsu<sup>1</sup>, Ton G. G. Groothuis<sup>2</sup> and Suvi Ruuskanen<sup>1</sup>

## ABSTRACT

Hormones transferred from mothers to their offspring are considered a maternal tool to prepare progeny for expected environmental conditions, increasing maternal and offspring fitness. To flexibly influence offspring, mothers should be able to transmit the hormonal signals independent of their own hormonal status. However, the ability to regulate hormone transfer to the next generation is under debate. We studied the transfer of thyroid hormones (THs) to eggs in a bird model. We elevated thyroxine ( $T_4$ , the prohormone for the biologically active triiodothyronine,  $T_3$ ) during egg laying using  $T_4$  implants in females of a wild population of pied flycatchers (*Ficedula hypoleuca*), and measured the resulting plasma and yolk  $T_4$  and  $T_3$  levels. We found an increase in plasma and yolk  $T_4$  and no change in plasma or yolk  $T_3$  concentration, leading to a decrease in yolk  $T_3/T_4$  ratio in response to the  $T_4$  treatment. The yolk  $T_3/T_4$  ratio was similar to the plasma ratio in females during the yolking phase. This suggests that mothers are not able to regulate TH transfer to yolk but may regulate the  $T_4$  to  $T_3$  conversion to avoid potential costs of elevated exposure to the active hormone to herself and to her progeny. The absence of regulation in hormone transfer to eggs is in contrast to our predictions. Future studies on deiodinase activity that converts  $T_4$  to  $T_3$  in maternal and embryonic tissues may help our understanding of how mothers regulate circulating THs during breeding, as well as the embryos' role in converting maternal  $T_4$  to its biologically active  $T_3$  form during development.

**KEY WORDS:** Maternal hormones, Maternal effects, Thyroxine, Triiodothyronine, Trade-offs, Birds

## INTRODUCTION

Maternal effects are the non-genetic influences of a mother on her progeny and are thought to be adaptive (Moore et al., 2019; Mousseau and Fox, 1998; Yin et al., 2019). Maternal hormones transferred to the next generation are a potential prenatal pathway for mothers to shape their offspring phenotype (Groothuis et al., 2005; Groothuis et al., 2019; Ruuskanen and Hsu, 2018). Transfer of maternal hormones may be adaptive when the environment of the offspring can be predicted by the mothers ('anticipatory maternal effects'; Marshall and Uller, 2007). Mothers transfer thyroid hormones (THs), which have so far received little attention compared with glucocorticoids and androgens (Ruuskanen and Hsu, 2018). THs are produced by the thyroid gland and are present in

two main forms: thyroxine ( $T_4$ ) and triiodothyronine ( $T_3$ ).  $T_4$ , a precursor of  $T_3$ , is converted to  $T_3$  in tissues.  $T_3$  exerts most of the TH action, as a result of its much greater affinity to TH receptors than  $T_4$  (ca. 50-fold greater; Zoeller et al., 2007), although  $T_4$  can also exert non-genomic actions (Davis et al., 2016). Thyroid hormones have pleiotropic effects that serve several biologically important functions across vertebrates, including growth, reproduction and metabolism (Behringer et al., 2018; Ruuskanen and Hsu, 2018).

Regulatory mechanisms of maternal hormone transfer are essential to minimise physiological trade-offs between optimal hormone exposure in the mother versus that in the offspring (Groothuis and Schwabl, 2008). For example, circulating THs increase with low temperature to stimulate metabolism and hence heat production (McNabb and Darras, 2015). If elevated maternal circulating THs increase yolk THs, this could stimulate embryo metabolism, which could be detrimental if the resources in the egg are insufficient to cope with the increased metabolism. The evidence for a regulatory mechanism for several hormones, including corticosterone and THs, is mixed (Groothuis and Schwabl, 2008), but such regulation could take place at the circulating level in the mothers and/or at the follicle level. Regulation at the follicle level may happen by controlling the transfer or conversion of THs or by producing THs independently from the thyroid gland. These mechanisms have been suggested to exist in human ovaries (Monteleone et al., 2017; Rae et al., 2007). Such regulatory mechanisms may allow mothers to regulate the deposition of THs in their eggs independently from their own circulating TH levels. This would free mothers from the possible constraint to optimise their own circulating levels of THs and the levels in their eggs independently of each other. A few studies in birds have shown some preliminary evidence that mothers may indeed be able to regulate yolk TH transfer. In Japanese quails, a low-dose oral administration of  $T_4$  resulted in an increase in yolk  $T_3$  but not in circulating  $T_3$ , whereas  $T_4$  increased in both tissues (Wilson and McNabb, 1997). Administration of  $T_3$  in turn increased plasma  $T_3$  but not yolk  $T_3$  (Wilson and McNabb, 1997). Furthermore, artificial blocking of TH production in hens led to a decrease in yolk  $T_3$  but not in plasma  $T_3$ , while  $T_4$  decreased in both tissues (Van Herck et al., 2013). These studies on domesticated precocial birds respectively induced hyperthyroidism for 3–6 weeks and hypothyroidism for 16 weeks. Such a long exposure to hormone concentrations outside of the natural range may have triggered responses one would not observe under natural variations. Therefore, there is a need for complementary studies under shorter time scales and within the physiological range of wild altricial species.

In this experiment, we tested whether mothers are able to regulate their transfer of yolk THs, at the circulating and/or at the follicle level. We experimentally manipulated TH levels with  $T_4$  implants using a within-subject design in female pied flycatchers (*Ficedula hypoleuca*) during egg laying and collected plasma samples and unincubated pre- and post-implantation eggs for the analysis of  $T_3$  and  $T_4$ . Implanting the prohormone  $T_4$  enabled us to test the possible differential conversion of this hormone to the biological

<sup>1</sup>Department of Biology, University of Turku, FI-20014, Turku, Finland. <sup>2</sup>Groningen Institute for Evolutionary Life Sciences, University of Groningen, 9747 AG Groningen, The Netherlands.

\*Author for correspondence (t.sarraude@rug.nl)

© T.S., 0000-0002-3548-0935; B.-Y.H., 0000-0002-3799-0509; T.G.G.G., 0000-0003-0741-2174; S.R., 0000-0001-5582-9455

active  $T_3$  in the mother as a regulatory mechanism to protect herself or the egg from increased exposure to these hormones. It also allowed us to test whether mothers can regulate the transfer of hormones to the egg. First, if the implant successfully increased circulating  $T_4$ , we would expect a higher availability of the substrate (i.e. the prohormone  $T_4$ ) in tissues and subsequent conversion to  $T_3$ . Some of the increased  $T_3$  in tissues may be released back into the circulation, leading to increased plasma  $T_3$  (e.g. Escobar-Morreale et al., 1995). Alternatively, females may buffer the increase in plasma  $T_4$  by downregulating the conversion of  $T_4$  to  $T_3$ , thus yielding no increase in tissue or plasma  $T_3$ . Second, we predicted that if mothers were able to regulate yolk TH transfer independently from their circulating levels, only one of these two compartments (i.e. plasma or yolk) would be affected by exogenous  $T_4$ , or one would be more affected than the other (Groothuis and Schwabl, 2008). In this case, the  $T_3/T_4$  ratio may be different between the two tissues. Conversely, if mothers were unable to regulate yolk TH transfer, one would expect both plasma and yolk THs to vary in the same direction and with a similar magnitude in response to exogenous  $T_4$  (Groothuis and Schwabl, 2008). Thus, the  $T_3/T_4$  ratio would not differ between the tissues. If implants increased plasma THs (i.e.  $T_4$  and/or  $T_3$ ), they may also have increased female metabolism, thus affecting their body mass and percentage of red blood cells (haematocrit). One would expect a decrease in body mass if resources are not sufficient, and an increase in haematocrit as a result of increased energy expenditure, although the latter relationship may not be so straightforward (Fair et al., 2007).

## MATERIALS AND METHODS

The experiment was conducted in 2016 and 2017 in Turku, Finland (60°26'N, 22°10'E). The study species, the pied flycatcher, *Ficedula hypoleuca* (Pallas 1764), generally lays a single clutch of 6–7 eggs. Into egg-laying females we inserted either a  $T_4$  implant or a control implant (see below for more details on the dose and implantation).

### Preparation of $T_4$ implants and implantation

Two types of sterile implants (ca. 3 mm of diameter) were used for this experiment: ready-made  $T_4$  pellets (10  $\mu\text{g}$ , hereafter  $T_4$  implant) and respective controls, which were identical, but without  $T_4$  (both implants from Innovative Research America, Sarasota, FL, USA). The amount of  $T_4$  in the implants was based on the natural production rate of  $T_4$  measured in chickens, quail and pigeons (1–3  $\mu\text{g}$   $T_4$  100  $\text{g}^{-1}$  body mass per day; McNabb and Darras, 2015) and adjusted to the average body mass of pied flycatchers. The  $T_4$  was embedded in a matrix that is designed to steadily release the hormone for 21 days.

Before implantation between the scapula, the skin was disinfected with a cotton pad dipped in 70% ethanol. An incision was made with an 18 gauge needle (BD Microlance™) and the implant was inserted and pushed away from the incision to avoid losing the implant. The

wound was sealed with veterinary tissue adhesive (3M Vetbond™), which is commonly used in experiments with pit tags and shown to have no effect on birds.

### Experimental design – captive females

First, to validate that implants increased circulating THs in a short time window after implantation, we conducted an experiment with female pied flycatchers in captivity in 2016. As the yolk formation takes approximately 3.5–4 days in passerines (Williams, 2012), implants inserted during egg laying need to increase hormone levels within days to enable quantification of their effect on newly formed eggs. We captured egg-laying female flycatchers from the wild population and housed them on a natural photoperiod and *ad libitum* food for the validation experiment as repeated disturbance during egg laying in the wild could cause nest desertion. Because of the similar treatment and breeding stage, we expect the data on wild-caught captive birds to be similar to plasma levels of wild birds in the main experiment (see below). On the 4th day after capture, each female received either a subcutaneous control or  $T_4$  implant ( $n=4$  per group). Blood samples were taken before the implant was inserted, and at 24 and 72 h after the implant (between 09.30 h and 11.30 h). After the last blood sample, females were released to the site where they were captured. Circulating TH levels in response to the implants are presented in Table 1.

### Experimental design – wild females

In the wild population, the experiment was conducted in 2016 and 2017. The first egg of a clutch was collected freshly on the day it was laid and replaced by a dummy egg as a within-clutch control (hereafter 'pre-implant'). On the morning that the second egg was laid (07:00–09:00 h), females were captured and weighed ( $\pm 0.1$  g), and received a  $T_4$  ( $n=11$ ) or a control implant ( $n=10$ ) as above. The last egg of the clutch (mean  $\pm$  s.d. egg rank  $6 \pm 0.25$ , hereafter 'post-implant') was collected on the day it was laid, as it is mostly formed under the influence of the hormone implant (see above). In total, we collected 26 eggs from 13 clutches (13 pre- and 13 post-implant eggs) in the  $T_4$  implant group, and 22 eggs from 11 clutches (11 pre- and 11 post-implant eggs) in the control group. Early in the incubation, on average  $1.3 \pm 1.0$  days (mean  $\pm$  s.d.) after the last egg was laid, females were blood sampled (08:00–12.30 h) for the analysis of circulating  $T_4$  and  $T_3$  ( $n=11$  for  $T_4$  implant and  $n=10$  for control, respectively, blood sample analysis failed for 3 females) as well as haematocrit (proportion of red blood cells obtained by centrifugation of the capillaries). Body mass was also recorded ( $\pm 0.1$  g) to analyse potential body mass loss following the insertion of the implant. During blood sampling, the implants were still visible, which indicates that the implants were still releasing  $T_4$  at that time.

### Hormone analysis

Blood samples (ca. 40  $\mu\text{l}$ ) were taken from the brachial vein. Plasma was collected via centrifugation and frozen at  $-20^\circ\text{C}$  until analysis.

**Table 1. Circulating thyroxine ( $T_4$ ), triiodothyronine ( $T_3$ ) and  $T_3/T_4$  ratio in captive female pied flycatchers in response to  $T_4$  or control implants**

|                                         | Control implant |                 |                 | $T_4$ implant   |                 |                 |
|-----------------------------------------|-----------------|-----------------|-----------------|-----------------|-----------------|-----------------|
|                                         | 0               | 24              | 72              | 0               | 24              | 72              |
| Time (h)                                |                 |                 |                 |                 |                 |                 |
| $n$                                     | 3               | 4               | 4               | 3               | 3               | 3               |
| $T_4$ ( $\text{pg } \mu\text{l}^{-1}$ ) | $4.9 \pm 1.7$   | $3.5 \pm 1.3$   | $4.9 \pm 1.9$   | $5.3 \pm 2.6$   | $28.9 \pm 18.0$ | $8.4 \pm 3.3$   |
| $T_3$ ( $\text{pg } \mu\text{l}^{-1}$ ) | $0.7 \pm 0.5$   | $0.5 \pm 0.4$   | $0.9 \pm 0.5$   | $0.7 \pm 0.1$   | $0.7 \pm 0.2$   | $1.1 \pm 0.2$   |
| $T_3/T_4$ ratio                         | $0.16 \pm 0.10$ | $0.20 \pm 0.19$ | $0.17 \pm 0.09$ | $0.18 \pm 0.14$ | $0.04 \pm 0.04$ | $0.15 \pm 0.09$ |

Females were sampled prior to insertion of the implant, and 24 and 72 h later. Thyroid hormone (TH) analysis of one sample (time 0 in control group) failed as a result of too low a plasma volume. TH data are means  $\pm$  s.d.

Eggs were thawed, the yolks separated and homogenised in MilliQ water (1:1), and a small sample (ca. 50 mg) was used for TH analysis. Yolk and plasma THs were analysed using nano-LC-MS/MS, following Ruuskanen et al. (2018, 2019). TH concentration, corrected for extraction efficiency, is expressed as pg mg<sup>-1</sup> yolk or pg ml<sup>-1</sup> plasma.

### Statistical analysis

Data were analysed with the software R version 3.6.2 (<http://www.R-project.org/>). Linear mixed models were fitted using the R package *lme4* (Bates et al., 2015). *P*-values were obtained by model comparison using Kenward–Roger approximation from the package *pbrtest* (Halekoh and Højsgaard, 2014). Estimated marginal means and standard errors (EMMs±s.e.) were derived from models using the package *emmeans* (<https://CRAN.R-project.org/package=emmeans>). Effect size estimates (Cohen's *d*) obtained from marginal means were computed with the package *emmeans*. Effect size estimates obtained from the raw data were calculated with the package *effsize* (<https://CRAN.R-project.org/package=effsize>). Model residuals were checked for normality and homogeneity with the package DHARMA (<https://CRAN.R-project.org/package=DHARMA>).

Yolk THs were ln-transformed to achieve normal distribution of the residuals. Yolk TH concentrations and T<sub>3</sub>/T<sub>4</sub> ratio were analysed by fitting linear mixed models that included the treatment (i.e. T<sub>4</sub> or control implant) as the predictor, hormone levels in the pre-implant egg and year as covariates, and the hormone assay as a random intercept. Pre-implant egg was added to account for the variation in yolk THs among females.

Plasma TH levels of the incubating females were analysed using linear regressions with treatment as a fixed factor and body mass, ambient temperature and time of the day as covariates, as these covariates are known to influence circulating levels (McNabb and Darras, 2015). Covariates were centred and scaled. Year was not included in the model as it covaried with ambient temperature (variance inflation factor, VIF>2), and the latter is known to affect circulating THs (McNabb and Darras, 2015). Plasma T<sub>3</sub>/T<sub>4</sub> ratio was ln-transformed and analysed with an identical linear regression to that for plasma THs.

Female haematocrit and loss of body mass were analysed by fitting linear models with treatment as the fixed factor, and year and clutch size (as a proxy for reproductive investment) as covariates.

Effect sizes (Cohen's *d*) of the treatment on yolk and wild female plasma THs were estimated from marginal means. Effect size estimates of the treatment on the T<sub>3</sub>/T<sub>4</sub> ratio in the yolk and in captive female plasma were computed from the raw data. To avoid nest abandonment, we did not blood sample wild females during egg laying. Therefore, we used the data from captive birds in the following way: plasma samples from captive females averaged over day 1 and 3 after the implantation (reflecting the yolking phase of the last egg in wild birds) were compared with the post-implant last eggs collected from wild females.

### Ethical note

The experiments were conducted under licence from the Animal Experiment Board of the Administrative Agency of South Finland (ESAVI1018/04.10.07/2016) and South-Western Finland Centre for Economic Development, Transport and Environment (VARELY/412/2016).

### RESULTS

Yolk THs of pre-implant eggs (first eggs of a clutch) did not differ between females with control or T<sub>4</sub> implants (mean±s.e. yolk T<sub>4</sub>,

control 8.29±0.61 pg mg<sup>-1</sup> yolk versus T<sub>4</sub> implant 7.63±0.43 pg mg<sup>-1</sup> yolk; yolk T<sub>3</sub>, control 2.85±0.20 pg mg<sup>-1</sup> yolk versus T<sub>4</sub> implant 2.94±0.38 pg mg<sup>-1</sup> yolk; all *t*≤0.89 and all *P*≥0.39). After receiving a T<sub>4</sub> implant, females produced eggs with ca. 2 times higher yolk T<sub>4</sub> concentration than control implanted females (EMM±s.e. post-T<sub>4</sub> implant egg 17.14±2.07 pg mg<sup>-1</sup> yolk versus post-control implant egg 8.54±1.08 pg mg<sup>-1</sup> yolk; Table 2, Figs 1A and 2A). Pre-implant yolk T<sub>4</sub> did not predict post-implant yolk T<sub>4</sub> (Table 2). In contrast, post-implant yolk T<sub>3</sub> did not differ between the groups (mean±s.e., control 2.34±0.27 pg mg<sup>-1</sup> yolk versus T<sub>4</sub> implant 2.72±0.29 pg mg<sup>-1</sup> yolk; Table 2, Figs 1B and 2A), but pre-implant yolk T<sub>3</sub> predicted post-implant yolk T<sub>3</sub> (Table 2).

Regarding circulating THs, captive females implanted with a T<sub>4</sub> implant had higher circulating T<sub>4</sub> than captive control females during the first 3 days after the implant (Table 1). There was a similar, but non-significant, trend in wild female plasma T<sub>4</sub> early in the incubation (when egg laying was finished, ca. 10 days after implantation) (Table 2). Plasma T<sub>3</sub> and T<sub>3</sub>/T<sub>4</sub> ratio were not affected by the implants in wild females (Table 2).

The treatment decreased the T<sub>3</sub>/T<sub>4</sub> ratio in the post-implant egg (Table 2) and the trend was similar for plasma levels in captive females sampled during egg formation (Table 1, Fig. 2B). The effect sizes for T<sub>3</sub>/T<sub>4</sub> ratios in plasma and in yolk largely overlapped, suggesting no clear difference between the two tissues (Fig. 2B).

**Table 2. Linear models of yolk and plasma THs in wild female pied flycatchers in response to T<sub>4</sub> implants**

|                                             | Estimate±s.e. | F <sub>ddf</sub> or T | P-value      |
|---------------------------------------------|---------------|-----------------------|--------------|
| <b>(A) Yolk THs</b>                         |               |                       |              |
| Yolk T <sub>4</sub>                         |               |                       |              |
| Implant (T <sub>4</sub> )                   | 0.75±0.19     | 14.96 <sub>17,6</sub> | <b>0.001</b> |
| Pre-implant egg                             | 0.07±0.06     | 1.09 <sub>20,0</sub>  | 0.31         |
| Year (2017)                                 | 0.09±0.20     | 0.18 <sub>18,2</sub>  | 0.67         |
| Yolk T <sub>3</sub>                         |               |                       |              |
| Implant (T <sub>4</sub> )                   | 0.12±0.11     | 1.09 <sub>17,1</sub>  | 0.31         |
| Pre-implant egg                             | 0.20±0.05     | 13.33 <sub>18,1</sub> | <b>0.002</b> |
| Year (2017)                                 | -0.01±0.12    | 0.01 <sub>17,8</sub>  | 0.92         |
| T <sub>3</sub> /T <sub>4</sub> ratio        |               |                       |              |
| Implant (T <sub>4</sub> )                   | -0.12±0.03    | 12.28 <sub>17,6</sub> | <b>0.003</b> |
| Pre-implant egg                             | -0.01±0.11    | 0.01 <sub>19,3</sub>  | 0.91         |
| Year (2017)                                 | -0.01±0.03    | 0.10 <sub>18,2</sub>  | 0.76         |
| <b>(B) Plasma THs</b>                       |               |                       |              |
| Plasma T <sub>4</sub>                       |               |                       |              |
| Implant (T <sub>4</sub> )                   | 1.16±0.75     | 1.54                  | 0.14         |
| Body mass                                   | -0.90±0.38    | -2.33                 | <b>0.03</b>  |
| Temperature                                 | 0.11±0.39     | 0.29                  | 0.78         |
| Time                                        | -0.46±0.39    | -1.80                 | 0.26         |
| Plasma T <sub>3</sub>                       |               |                       |              |
| Implant (T <sub>4</sub> )                   | 0.14±0.15     | 0.95                  | 0.36         |
| Body mass                                   | -0.02±0.08    | -0.26                 | 0.80         |
| Temperature                                 | -0.05±0.08    | -0.26                 | 0.58         |
| Time                                        | -0.09±0.08    | -1.16                 | 0.26         |
| Plasma T <sub>3</sub> /T <sub>4</sub> ratio |               |                       |              |
| Implant (T <sub>4</sub> )                   | -0.13±0.29    | -0.45                 | 0.66         |
| Body mass                                   | 0.23±0.15     | 1.54                  | 0.14         |
| Temperature                                 | -0.10±0.15    | -0.64                 | 0.53         |
| Time                                        | 0.02±0.15     | 0.15                  | 0.89         |

(A) Full linear mixed models of yolk THs in response to T<sub>4</sub> implants in wild pied flycatchers (T<sub>4</sub> implant *n*=13 pre-implant and *n*=13 post-implant and *n*=13 eggs; control *n*=11 pre-implant and *n*=11 post-implant eggs). Hormone assay was included as a random intercept. *F*-value denominator degrees of freedom (ddf) are shown; numerator degrees of freedom (ndf)=1 in each case. (B) Full linear models of plasma THs in response to T<sub>4</sub> implants, in wild female pied flycatchers (T<sub>4</sub> implant *n*=11 females; control *n*=10 females). Covariates in B were centred and scaled. *P*-values in B were obtained by separate *t*-test for each predictor. Significant *P*-values are shown in bold.

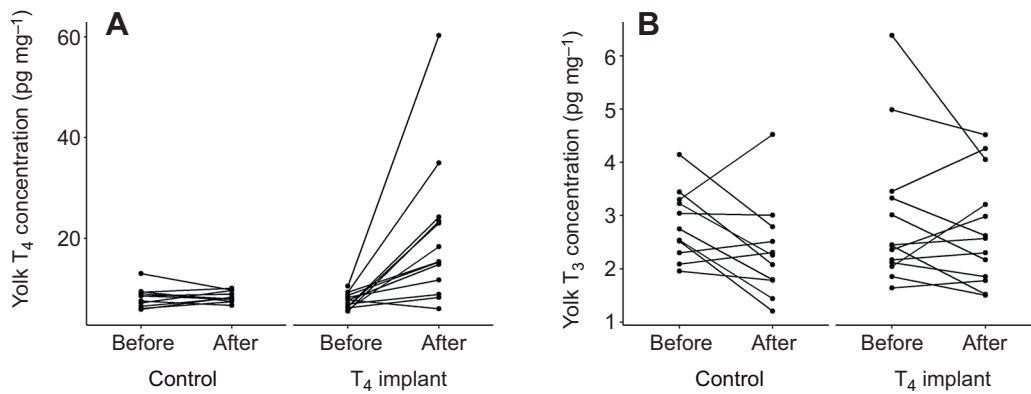

**Fig. 1. Experimental manipulation of thyroid hormone (TH) levels in female pied flycatchers.** Concentrations of thyroxine (T<sub>4</sub>; A) and triiodothyronine (T<sub>3</sub>; B) in eggs of female pied flycatchers implanted with a control implant ( $n=11$  pre-implant and  $n=11$  post-implant eggs) or 10  $\mu\text{g}$  T<sub>4</sub> implant ( $n=13$  pre-implant and  $n=13$  post-implant eggs). 'Before' and 'after' respectively refer to eggs collected before or after the females had received an implant.

The T<sub>4</sub> implant did not affect female body mass loss or haematocrit (Table 3). Female body mass loss and haematocrit did not differ between the sampling years (Table 3). Clutch size was not associated with female body mass loss, but was positively related to haematocrit (Table 3).

## DISCUSSION

To our knowledge, this study is the first to manipulate circulating THs of a wild bird species during egg laying, to study potential regulation of maternal TH transfer at the level of the mother's circulation and at the follicle level. Contrary to previous studies on other maternal hormones (e.g. steroid hormones), we looked not only at the response in the implanted hormone T<sub>4</sub> but also at its more active metabolite T<sub>3</sub>. To our knowledge, studies that manipulated a prohormone and measured the change in its active metabolites have rarely been conducted. We detected no effects of exogenous T<sub>4</sub> on female haematocrit or body mass. We found an increase in plasma and yolk T<sub>4</sub> in response to exogenous T<sub>4</sub>. This result would indicate an absence of regulation in the transfer of T<sub>4</sub> from mothers to their eggs, supporting the epiphenomenon hypothesis of Groothuis and Schwabl (2008), namely that yolk hormones merely reflect or mirror the maternal circulating levels. Yet, there was a brief peak in T<sub>4</sub> levels, with relatively high plasma T<sub>4</sub> levels occurring during the yolking

phase (Table 1), and we cannot fully exclude the potential explanation that any regulatory mechanism would have failed under high T<sub>4</sub>. We predicted that elevated plasma T<sub>4</sub> would increase plasma or yolk T<sub>3</sub>, the more potent hormone, because of the increased amount of its precursor, T<sub>4</sub>. However, we observed no changes in circulating or yolk T<sub>3</sub>. Our study therefore probably failed to induce a trade-off in mothers between plasma and yolk T<sub>3</sub>, and we thus cannot conclude on the presence or absence of a regulatory mechanism for maternal transfer of yolk T<sub>3</sub>. The unchanged plasma T<sub>3</sub> concentrations together with the rapid decrease in plasma T<sub>4</sub> after implantation observed in captive females (Table 1) suggest a change in the peripheral TH metabolism to quickly remove excess T<sub>4</sub>. In rats, hyperthyroidism increases the conversion of T<sub>4</sub> and T<sub>3</sub> into inactive metabolites (Bianco et al., 2002). Likewise, increased circulating T<sub>4</sub> rapidly decreases the conversion of T<sub>4</sub> into T<sub>3</sub> (Bianco et al., 2002). Both mechanisms prevent the production of T<sub>3</sub>, which may explain why we observed no increase in plasma T<sub>3</sub>. Because plasma T<sub>3</sub> is known to positively correlate with basal metabolic rate in wild birds (Chastel et al., 2003; Elliott et al., 2013; Welcker et al., 2013), these mechanisms may allow individuals to cope with elevated THs and could be important tools for mothers to protect themselves and their progeny from the potentially detrimental consequences of elevated T<sub>3</sub>. As T<sub>3</sub> binds with 50 times greater affinity to TH receptors than does T<sub>4</sub> (Zoeller et al., 2007), it is

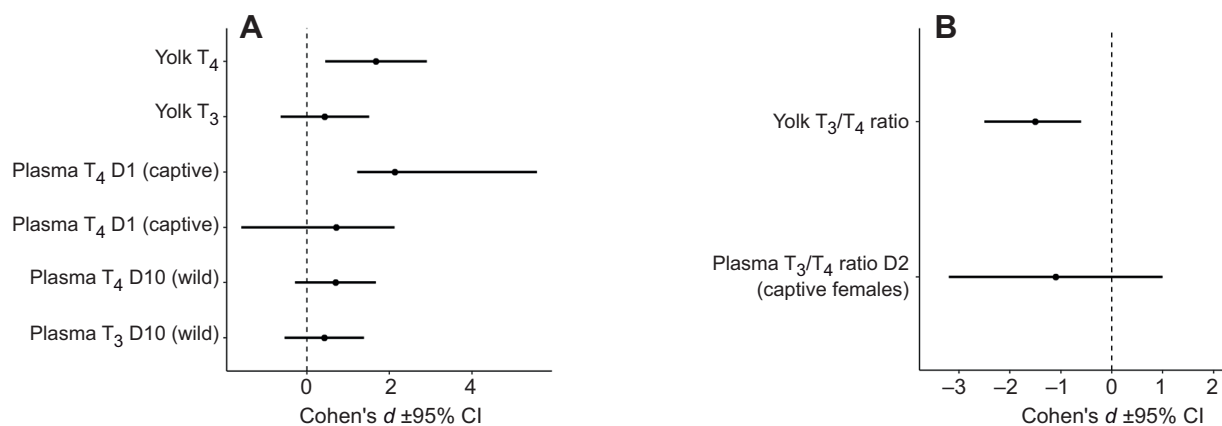

**Fig. 2. Yolk and plasma levels of T<sub>3</sub> and T<sub>4</sub> in captive and wild females.** (A) Cohen's  $d$  and 95% confidence intervals (CIs) for yolk (post-implant egg) and plasma (wild females) T<sub>3</sub> and T<sub>4</sub> were calculated from the marginal means of the respective models. Cohen's  $d$  and 95% CIs for plasma of captive females were calculated from the raw data. D1, 1 day after implantation; D10, 10 days after implantation. (B) Cohen's  $d$  and 95% CIs for the T<sub>3</sub>/T<sub>4</sub> ratio in the yolk (post-implant egg) and plasma (captive females) calculated from the raw data. D2, 2 days after implantation, obtained by averaging the values for day 1 and day 3 after implantation. This period overlaps with the timing of yolk formation of the post-implant eggs, and thus reflects the circulating TH levels during yolk formation.

**Table 3. Linear models of body mass loss and haematocrit in wild female pied flycatchers in response to T<sub>4</sub> implants**

|                           | Estimate±s.e. | T     | P-value     |
|---------------------------|---------------|-------|-------------|
| Body mass loss            |               |       |             |
| Implant (T <sub>4</sub> ) | -0.16±0.56    | -0.28 | 0.79        |
| Year (2017)               | 0.04±0.65     | 0.06  | 0.95        |
| Clutch size               | -0.24±0.35    | -0.68 | 0.51        |
| Haematocrit               |               |       |             |
| Implant (T <sub>4</sub> ) | 0.03±0.02     | 1.53  | 0.14        |
| Year (2017)               | 0.04±0.02     | 1.52  | 0.15        |
| Clutch size               | 0.04±0.02     | 2.66  | <b>0.02</b> |

T<sub>4</sub> implant n=11 females; control n=10 females. Significant P-value is shown in bold.

reasonable to expect a stricter regulation of the more potent hormone. This is indeed in line with previous studies reporting that yolk T<sub>3</sub> showed low within-individual variation, contrary to yolk T<sub>4</sub> (Hsu et al., 2019b), and that yolk T<sub>3</sub> was heritable whereas yolk T<sub>4</sub> was not (Ruuskanen et al., 2016a). To ascertain the hypothesis of a regulation of the T<sub>4</sub> to T<sub>3</sub> conversion, one should analyse the expression and activity of different enzymes involved in TH metabolism in response to exogenous THs, both in mothers and in embryos.

In addition to regulating their own plasma levels of THs, we hypothesised that mothers may be able to regulate the exposure of the developing follicles to THs. Elevated yolk THs (within the natural range) can affect hatching success, offspring growth and metabolism as found by studies in altricial species (Hsu et al., 2017; Hsu et al., 2019a; Ruuskanen et al., 2016b). We found no evidence for such a regulatory mechanism, as the T<sub>3</sub>/T<sub>4</sub> ratio appeared not to differ between female plasma at the time of yolking (data from captive birds) and yolk. This result is contrary to that of Wilson and McNabb (1997), where yolk T<sub>3</sub> but not circulating T<sub>3</sub> was increased in response to long-term T<sub>4</sub> administration. This contradiction may be caused by different time scales between the two studies, the method of administration and/or the timing of sampling. In our study, the peak in T<sub>4</sub> rapidly decreased after implantation. Conversely, Wilson and McNabb (1997) administered exogenous T<sub>4</sub> for longer periods of time, which might have forced females to deposit T<sub>3</sub> in their eggs to maintain normal plasma T<sub>3</sub>.

We found no evidence for regulation of plasma T<sub>4</sub> concentration or T<sub>4</sub> transfer to the yolk, suggesting that yolk T<sub>4</sub> levels reflect circulating levels in the mother. Nevertheless, we found evidence that females regulated plasma T<sub>3</sub> concentration, while the results on yolk T<sub>3</sub> regulation remain inconclusive because of the lack of change in plasma T<sub>3</sub>. Whether the potential regulation of plasma T<sub>3</sub> is due to changes in the T<sub>4</sub> to T<sub>3</sub> conversion and whether it has been selected to benefit the mother or the offspring is as yet unclear. This could be tested by elevating plasma and yolk T<sub>3</sub> and measuring whether potential detrimental effects are larger in the mother or the offspring. Further studies could also aim at investigating the changes in TH metabolism (enzyme production and activity) in response to increased hormone levels.

#### Acknowledgements

We thank Sophie Michon and Florine Ceccantini for their help in the field. Mass spectrometry was performed at the Turku Proteomics Facility, University of Turku, supported by Biocenter Finland.

#### Competing interests

The authors declare no competing or financial interests.

#### Author contributions

Conceptualization: T.S., S.R.; Methodology: T.S., S.R.; Formal analysis: T.S.; Investigation: T.S., S.R.; Writing - original draft: T.S.; Writing - review & editing: T.S.,

B.H., T.G.G., S.R.; Supervision: T.G.G., S.R.; Project administration: S.R.; Funding acquisition: T.G.G., S.R.

#### Funding

The study was funded by the Academy of Finland (grant no. 286278 to S.R.), the Finnish National Agency for Education (Opetushallitus; grant no. TM-15-9960 to T.S.), the Societas pro Fauna et Flora Fennica (grant to T.S.) and the University of Groningen (grant to T.G.).

#### Data availability

Data are available from the Zenodo digital repository: <https://doi.org/10.5281/zenodo.3747401>

#### References

- Bates, D., Mächler, M., Bolker, B. and Walker, S. (2015). Fitting Linear Mixed-Effects Models Using lme4. *J. Stat. Softw.* **67**, 1–48. doi:10.18637/jss.v067.i01
- Behringer, V., Deimel, C., Hohmann, G., Negrey, J., Schaebs, F. S. and Deschner, T. (2018). Applications for non-invasive thyroid hormone measurements in mammalian ecology, growth, and maintenance. *Horm. Behav.* **105**, 66–85. doi:10.1016/j.yhbeh.2018.07.011
- Bianco, A. C., Salvatore, D., Gereben, B. Z., Berry, M. J. and Larsen, P. R. (2002). Biochemistry, Cellular and Molecular Biology, and Physiological Roles of the Iodothyronine Selenodeiodinases. *Endocr. Rev.* **23**, 38–89. doi:10.1210/edrv.23.1.0455
- Chastel, O., Lacroix, A. and Kersten, M. (2003). Pre-breeding energy requirements: thyroid hormone, metabolism and the timing of reproduction in house sparrows *Passer domesticus*. *J. Avian Biol.* **34**, 298–306. doi:10.1034/j.1600-048X.2003.02528.x
- Davis, P. J., Goglia, F. and Leonard, J. L. (2016). Nongenomic actions of thyroid hormone. *Nat. Rev. Endocrinol.* **12**, 111–121. doi:10.1038/nrendo.2015.205
- Elliott, K. H., Welcker, J., Gaston, A. J., Hatch, S. A., Palace, V., Hare, J. F., Speakman, J. R. and Anderson, W. G. (2013). Thyroid hormones correlate with resting metabolic rate, not daily energy expenditure, in two charadriiform seabirds. *Biol. Open* **2**, 580–586. doi:10.1242/bio.20134358
- Escobar-Morreale, H. F., Obregón, M. J., Escobar del Rey, F. and Morreale de Escobar, G. (1995). Replacement therapy for hypothyroidism with thyroxine alone does not ensure euthyroidism in all tissues, as studied in thyroidectomized rats. *J. Clin. Invest.* **96**, 2828–2838. doi:10.1172/JCI118353
- Fair, J., Whitaker, S. and Pearson, B. (2007). Sources of variation in haematocrit in birds: Haematocrit variation in birds. *Ibis* **149**, 535–552. doi:10.1111/j.1474-919X.2007.00680.x
- Groothuis, T. G. G. and Schwabl, H. (2008). Hormone-mediated maternal effects in birds: mechanisms matter but what do we know of them? *Philos. Trans. R. Soc. B Biol. Sci.* **363**, 1647–1661. doi:10.1098/rstb.2007.0007
- Groothuis, T. G. G., Müller, W., von Engelhardt, N., Carere, C. and Eising, C. (2005). Maternal hormones as a tool to adjust offspring phenotype in avian species. *Neurosci. Biobehav. Rev.* **29**, 329–352. doi:10.1016/j.neubiorev.2004.12.002
- Groothuis, T. G. G., Hsu, B.-Y., Kumar, N. and Tschirren, B. (2019). Revisiting mechanisms and functions of prenatal hormone-mediated maternal effects using avian species as a model. *Philos. Trans. R. Soc. B Biol. Sci.* **374**, 20180115. doi:10.1098/rstb.2018.0115
- Halekoh, U. and Højsgaard, S. (2014). A Kenward-Roger Approximation and Parametric Bootstrap Methods for Tests in Linear Mixed Models – The R Package pbkrtest. *J. Stat. Softw.* **59**, 1–32. doi:10.18637/jss.v059.i09
- Hsu, B.-Y., Dijkstra, C., Darras, V. M., de Vries, B. and Groothuis, T. G. G. (2017). Maternal thyroid hormones enhance hatching success but decrease nestling body mass in the rock pigeon (*Columba livia*). *Gen. Comp. Endocrinol.* **240**, 174–181. doi:10.1016/j.ygcen.2016.10.011
- Hsu, B.-Y., Doligez, B., Gustafsson, L. and Ruuskanen, S. (2019a). Transient growth-enhancing effects of elevated maternal thyroid hormones at no apparent oxidative cost during early postnatal period. *J. Avian Biol.* **50**, e01919.
- Hsu, B.-Y., Verhagen, I., Gienapp, P., Darras, V. M., Visser, M. E. and Ruuskanen, S. (2019b). Between- and within-individual variation of maternal thyroid hormone deposition in wild great tits (*Parus major*). *Am. Nat.* **194**, E96–E108. doi:10.1086/704738
- Marshall, D. J. and Uller, T. (2007). When is a maternal effect adaptive? *Oikos* **116**, 1957–1963. doi:10.1111/j.2007.0030-1299.16203.x
- McNabb, F. M. A. and Darras, V. M. (2015). Thyroids. In *Sturkie's Avian Physiology* (6th edn), pp. 535–547. London: Elsevier.
- Monteleone, P., Faviana, P. and Artini, P. G. (2017). Thyroid peroxidase identified in human granulosa cells: another piece to the thyroid-ovary puzzle? *Gynecol. Endocrinol.* **33**, 574–576. doi:10.1080/09513590.2017.1296424
- Moore, M. P., Whiteman, H. H. and Martin, R. A. (2019). A mother's legacy: the strength of maternal effects in animal populations. *Ecol. Lett.* **22**, 1620–1628. doi:10.1111/ele.13351
- Mousseau, T. A. and Fox, C. W. (1998). The adaptive significance of maternal effects. *Trends Ecol. Evol.* **13**, 403–407. doi:10.1016/S0169-5347(98)01472-4

- Rae, M. T., Gubbay, O., Kostogiannou, A., Price, D., Critchley, H. O. D. and Hillier, S. G. (2007). Thyroid Hormone Signaling in Human Ovarian Surface Epithelial Cells. *J. Clin. Endocrinol. Metab.* **92**, 322-327. doi:10.1210/jc.2006-1522
- Ruuskanen, S. and Hsu, B.-Y. (2018). Maternal Thyroid Hormones: An Unexplored Mechanism Underlying Maternal Effects in an Ecological Framework. *Physiol. Biochem. Zool.* **91**, 904-916. doi:10.1086/697380
- Ruuskanen, S., Gienapp, P., Groothuis, T. G. G., Schaper, S. V., Darras, V. M., Pereira, C., de Vries, B. and Visser, M. E. (2016a). Heritable variation in maternally derived yolk androgens, thyroid hormones and immune factors. *Heredity* **117**, 184-190. doi:10.1038/hdy.2016.49
- Ruuskanen, S., Darras, V. M., Visser, M. E. and Groothuis, T. G. G. (2016b). Effects of experimentally manipulated yolk thyroid hormone levels on offspring development in a wild bird species. *Horm. Behav.* **81**, 38-44. doi:10.1016/j.yhbeh.2016.03.006
- Ruuskanen, S., Hsu, B.-Y., Heinonen, A., Vainio, M., Darras, V. M., Sarraude, T. and Rokka, A. (2018). A new method for measuring thyroid hormones using nano-LC-MS/MS. *J. Chromatogr. B* **1093-1094**, 24-30.
- Ruuskanen, S., Espín, S., Sánchez-Virosta, P., Sarraude, T., Hsu, B.-Y., Pajunen, P., Costa, R. A., Eens, M., Hargitai, R., Török, J. et al. (2019). Transgenerational endocrine disruption: Does elemental pollution affect egg or nestling thyroid hormone levels in a wild songbird? *Environ. Pollut.* **247**, 725-735. doi:10.1016/j.envpol.2019.01.088
- Van Herck, S. L. J., Geysens, S., Bald, E., Chwatko, G., Delezie, E., Dianati, E., Ahmed, R. G. and Darras, V. M. (2013). Maternal transfer of methimazole and effects on thyroid hormone availability in embryonic tissues. *J. Endocrinol.* **218**, 105-115. doi:10.1530/JOE-13-0089
- Welcker, J., Chastel, O., Gabrielsen, G. W., Guillaumin, J., Kitaysky, A. S., Speakman, J. R., Tremblay, Y. and Bech, C. (2013). Thyroid Hormones Correlate with Basal Metabolic Rate but Not Field Metabolic Rate in a Wild Bird Species. *PLoS One* **8**, e56229. doi:10.1371/journal.pone.0056229
- Williams, T. D. (2012). *Physiological adaptations for breeding in birds*. Princeton, NJ, USA: Princeton University Press.
- Wilson, C. M. and McNabb, F. M. A. (1997). Maternal Thyroid Hormones in Japanese Quail Eggs and Their Influence on Embryonic Development. *Gen. Comp. Endocrinol.* **107**, 153-165. doi:10.1006/gcen.1997.6906
- Yin, J., Zhou, M., Lin, Z., Li, Q. Q. and Zhang, Y. (2019). Transgenerational effects benefit offspring across diverse environments: a meta-analysis in plants and animals. *Ecol. Lett.* **22**, 1976-1986. doi:10.1111/ele.13373
- Zoeller, R. T., Tan, S. W. and Tyl, R. W. (2007). General background on the hypothalamic-pituitary-thyroid (HPT) axis. *Crit. Rev. Toxicol.* **37**, 11-53. doi:10.1080/10408440601123446
